# Supplementary figures and images for: Enhanced photoluminescence from poly(phenylene vinylene) ∶ dendrimer polyelectrolyte assemblies in solution
Source: Royal Society of Chemistry journal article supplement (doi:10.1039/b401682c), 2004-01-01

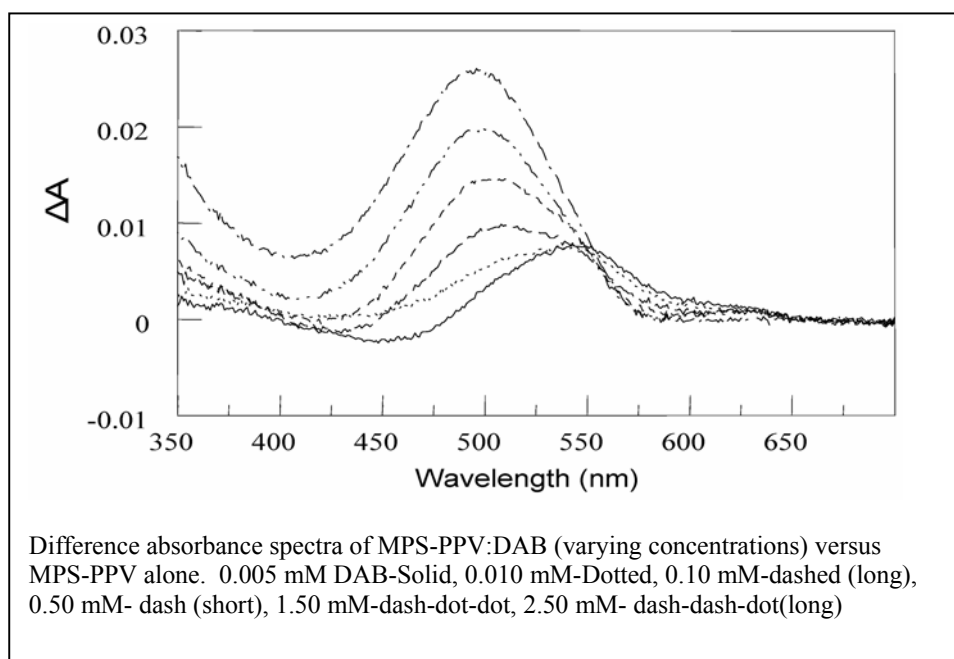

Supplement: b401682c.pdf [file b401682c.pdf]
